# Supplementary material
Source: PubMed Central journal article supplement (PMC5876812)
Supplement: jamainternmed-178-477-s001.pdf [file jamainternmed-178-477-s001.pdf]

## Supplementary Online Content

Waxman DA, Kanzaria HK, Schriger DL. Unrecognized cardiovascular emergencies among Medicare patients. *JAMA Intern Med*. Published online February 26, 2018.  
doi:10.1001/jamainternmed.2017.8628

**eTable 1.** ICD-9-CM Codes Used to Define the Index Hospital Admission

**eTable 2.** Effect of Excluding Recent Hospitalizations

**eTable 3.** Effect of Excluding Discharges After Observation Admissions

**eTable 4.** Effect of Varying Duration of “Pre-admission Window”

**eTable 5.** Discharge Diagnoses Associated With Unrecognized Emergencies

**eFigure.** Distribution of ED Visits

This supplementary material has been provided by the authors to give readers additional information about their work.

**eTable 1.** ICD-9-CM Codes Used to Define the Index Hospital Admission

| <b>Index event</b>                 | <b>ICD-9 codes (principal discharge diagnosis)</b>                          |
|------------------------------------|-----------------------------------------------------------------------------|
| Ruptured Abdominal Aortic Aneurysm | 441.3, 441.5, 441.6                                                         |
| Acute Myocardial Infarction        | 410.0, 410.01, 410.11, 410.21, 410.31, 410.41, 410.51, 410.61               |
| Aortic Dissection                  | 441.0, 441.00, 441.01, 441.03, 441.1, 441.6                                 |
| Stroke                             | 433.01, 433.11, 433.21, 433.31, 433.81, 433.91, 434.01, 434.11, 434.91, 436 |
| Subarachnoid Hemorrhage            | 430                                                                         |
|                                    |                                                                             |

Note: Diagnoses codes were chosen to ensure that index hospitalizations represented true acute events. Those considered to be potentially nonspecific (e.g. 410.81—AMI NEC, and 410.91—AMI NOS) were excluded.

## **Sensitivity Analyses**

eTables 2-4 show how results change with different methodological choices. These results can be compared to the primary study results summarized in table 2.

**eTable 2.** Effect of Excluding Recent Hospitalizations

|     | Index patients (N) | Observed ED discharges (N) | Expected ED discharges (N) | Potential diagnostic opportunities missed (% , 95% CI) |
|-----|--------------------|----------------------------|----------------------------|--------------------------------------------------------|
| AAA | 16,681             | 1,241                      | 733                        | 3.0% [2.4% -3.4%]                                      |
| AMI | 286,503            | 20,104                     | 14,094                     | 2.1% [1.9% -2.2%]                                      |
| CVA | 1,083,270          | 111,693                    | 68,572                     | 3.8% [3.8% -3.9%]                                      |
| DIS | 18,186             | 1,917                      | 1,152                      | 4.0% [3.5% -4.6%]                                      |
| SAH | 35,059             | 3,364                      | 2,102                      | 3.5% [3.1% -3.9%]                                      |

eTable 2 shows the effect of case-wise exclusion of patients discharged from any inpatient facility within 30 days of their index hospital admission, and (to avoid resulting bias) also excluding ED discharges that were preceded by any inpatient discharge within the prior 30 days.

**eTable 3.** Effect of Excluding Discharges After Observation Admissions

|     | Index patients (N) | Observed ED discharges (N) | Expected ED discharges (N) | Potential diagnostic opportunities missed (% , 95% CI) |
|-----|--------------------|----------------------------|----------------------------|--------------------------------------------------------|
| AAA | 17,963             | 1,482                      | 873                        | 3.3% [2.8% -3.8%]                                      |
| AMI | 304,980            | 22,876                     | 16,695                     | 2.0% [1.9% -2.1%]                                      |
| CVA | 1,181,648          | 127,954                    | 82,586                     | 3.7% [3.6% -3.8%]                                      |
| DIS | 19,675             | 2,138                      | 1,393                      | 3.6% [3.1% -4.2%]                                      |
| SAH | 37,674             | 3,867                      | 2,577                      | 3.3% [3.0% -3.7%]                                      |

eTable 3. In the primary analysis, we counted ED visits that ended in discharge home from an observation unit as ED discharges. eTable 3 shows the effect of treating these ED visits as neutral—counting them neither as discharges nor hospital admissions.

**eTable 4.** Effect of Varying Duration of “Pre-admission Window”

|     | INDEX PATIENTS<br>(N) | ED DISCHARGES (N)                         |          |                      |          |                      |          |
|-----|-----------------------|-------------------------------------------|----------|----------------------|----------|----------------------|----------|
|     |                       | <u>Days 1-30</u>                          |          | <u>Days 1-45</u>     |          | <u>Days 1-60</u>     |          |
|     |                       | Observed                                  | Expected | Observed             | Expected | Observed             | Expected |
| AAA | 17,963                | 1,279                                     | 663      | 1,603                | 970      | 1,936                | 1,259    |
| AMI | 304,980               | 19,160                                    | 12,496   | 25,622               | 18,483   | 31,925               | 24,304   |
| CVA | 1,181,648             | 109,105                                   | 63,209   | 142,743              | 92,348   | 174,821              | 120,330  |
| DIS | 19,675                | 1,913                                     | 1,071    | 2,482                | 1,565    | 3,045                | 2,023    |
| SAH | 37,674                | 3,237                                     | 1,949    | 4,245                | 2,871    | 5,176                | 3,816    |
|     |                       |                                           |          |                      |          |                      |          |
|     |                       |                                           |          |                      |          |                      |          |
|     |                       | <b>ESTIMATES (% Opportunities Missed)</b> |          |                      |          |                      |          |
|     |                       | <u>30-day window</u>                      |          | <u>45-day window</u> |          | <u>60-day window</u> |          |
| AAA | 17,963                | 3.3% [2.9% -3.7%]                         |          | 3.4% [2.9% -4.0%]    |          | 3.6% [3.0% -4.3%]    |          |
| AMI | 304,980               | 2.1% [2.0% -2.2%]                         |          | 2.3% [2.1% -2.4%]    |          | 2.4% [2.3% -2.6%]    |          |
| CVA | 1,181,648             | 3.7% [3.7% -3.8%]                         |          | 4.1% [4.0% -4.2%]    |          | 4.4% [4.3% -4.5%]    |          |
| DIS | 19,675                | 4.1% [3.6% -4.6%]                         |          | 4.5% [3.9% -5.1%]    |          | 4.9% [4.2% -5.7%]    |          |
| SAH | 37,674                | 3.3% [3.0% -3.6%]                         |          | 3.5% [3.1% -3.9%]    |          | 3.5% [3.0% -4.0%]    |          |

eTable 4 shows the effect of changing the how far in advance of the index hospitalization to look for excess ED discharges. Estimates are given for 30 days, 45 days, and 60 days. For example, 30-day results fit the logistic model using data for 365 to 31 days prior to the index admission, and use the difference between the sum of observed and expected ED discharges for the 30 days immediately preceding admission. The 45-day results are the same as those given in Table 2 of the main text.

In general, shorter windows (e.g. 30-days vs. 45 days) would be expected to increase the estimated “baseline rate of ED discharges” (since visits previously counted as “excess” would tend to steepen the regression line), and reduce the missed diagnosis rate to some degree. The converse would be true for longer windows.

**eTable 5.** Discharge Diagnoses Associated with Unrecognized Emergencies

| <b>Abdominal Aortic Aneurysm</b>                        |          |          |                                  |
|---------------------------------------------------------|----------|----------|----------------------------------|
| <b>Diagnoses in greatest excess (observed-expected)</b> | Observed | Expected | Incidence Rate Ratio<br>[95% CI] |
| Abdominal pain, unspecified site                        | 74       | 11.0     | 6.7 [4.8,9.4]                    |
| Lumbago                                                 | 72       | 9.8      | 7.3 [5.2,10.3]                   |

|                                                                          |    |      |                  |
|--------------------------------------------------------------------------|----|------|------------------|
| Abdominal pain, other specified site                                     | 59 | 8.6  | 6.9 [4.7,10.0]   |
| Constipation, unspecified                                                | 55 | 11.3 | 4.9 [3.4,7.0]    |
| Urinary tract infection, site not specified                              | 62 | 21.7 | 2.9 [2.1,3.9]    |
| Backache, unspecified                                                    | 38 | 5.5  | 6.9 [4.3,11.1]   |
| Obstructive chronic bronchitis with (acute) exacerbation                 | 40 | 20.0 | 2.0 [1.4,2.9]    |
| Syncope and collapse                                                     | 33 | 15.9 | 2.1 [1.4,3.1]    |
| Chest pain, unspecified                                                  | 37 | 21.8 | 1.7 [1.2,2.4]    |
| Sprain of lumbar                                                         | 16 | 2.4  | 6.7 [3.2,14.1]   |
| Pain in joint, pelvic region and thigh                                   | 17 | 5.2  | 3.3 [1.7,5.9]    |
| Pneumonia, organism unspecified                                          | 22 | 10.1 | 2.2 [1.3,3.5]    |
| Sciatica                                                                 | 12 | 1.3  | 9.5 [3.7,25.5]   |
| Abdominal pain, right lower quadrant                                     | 12 | 1.7  | 7.1 [2.9,17.3]   |
| Abdominal pain, left lower quadrant                                      | 13 | 2.7  | 4.9 [2.2,10.4]   |
| Shortness of breath                                                      | 14 | 3.5  | 4.0 [1.9,8.0]    |
| Chronic airway obstruction, not elsewhere classified                     | 14 | 4.2  | 3.3 [1.6,6.5]    |
| Other malaise and fatigue                                                | 22 | 12.4 | 1.8 [1.1,2.9]    |
| Nausea with vomiting                                                     | 13 | 4.2  | 3.1 [1.5,6.1]    |
| Open wound of forearm, without mention of complication                   | 14 | 5.5  | 2.6 [1.3,4.8]    |
|                                                                          |    |      |                  |
| <b>Diagnoses with highest incident rate ratios (observed/expected)</b>   |    |      |                  |
| Lumbago                                                                  | 72 | 9.8  | 7.3 [5.2 , 10.3] |
| Abdominal pain, unspecified site                                         | 74 | 11.0 | 6.7 [4.8 , 9.4]  |
| Abdominal pain, other specified site                                     | 59 | 8.6  | 6.9 [4.7 , 10.0] |
| Backache, unspecified                                                    | 38 | 5.5  | 6.9 [4.3 , 11.1] |
| Sciatica                                                                 | 12 | 1.3  | 9.5 [3.7 , 25.5] |
| Constipation, unspecified                                                | 55 | 11.3 | 4.9 [3.4 , 7.0]  |
| Sprain of lumbar                                                         | 16 | 2.4  | 6.7 [3.2 , 14.1] |
| Abdominal pain, right lower quadrant                                     | 12 | 1.7  | 7.1 [2.9 , 17.3] |
| Abdominal pain, generalized                                              | 8  | 0.8  | 9.5 [2.9 , 33.2] |
| Abdominal pain, left lower quadrant                                      | 13 | 2.7  | 4.9 [2.2 , 10.4] |
| Closed fracture of lumbar vertebra without mention of spinal cord injury | 6  | 0.7  | 8.5 [2.2 , 35.3] |
| Urinary tract infection, site not specified                              | 62 | 21.7 | 2.9 [2.1 , 3.9]  |
| Other chronic pain                                                       | 8  | 1.4  | 5.7 [2.0 , 16.0] |
| Shortness of breath                                                      | 14 | 3.5  | 4.0 [1.9 , 8.0]  |
| Pain in joint, pelvic region and thigh                                   | 17 | 5.2  | 3.3 [1.7 , 5.9]  |
| Chronic airway obstruction, not elsewhere classified                     | 14 | 4.2  | 3.3 [1.6 , 6.5]  |
| Obstructive chronic bronchitis with acute bronchitis                     | 11 | 3.0  | 3.7 [1.6 , 8.1]  |
| Closed fracture of one rib                                               | 7  | 1.4  | 5.0 [1.6 , 14.5] |
| Vomiting alone                                                           | 10 | 2.7  | 3.7 [1.6 , 8.5]  |
| Nausea with vomiting                                                     | 13 | 4.2  | 3.1 [1.5 , 6.1]  |

| <b>Acute Myocardial Infarction</b>                                      |          |          |                               |
|-------------------------------------------------------------------------|----------|----------|-------------------------------|
| <b>Diagnoses in greatest excess</b> (observed-expected)                 | Observed | Expected | Incidence Rate Ratio [95% CI] |
| Chest pain, unspecified                                                 | 1871     | 676.7    | 2.8 [2.6,2.9]                 |
| Other chest pain                                                        | 1256     | 512.2    | 2.5 [2.3,2.6]                 |
| Urinary tract infection, site not specified                             | 681      | 434.0    | 1.6 [1.4,1.7]                 |
| Esophageal reflux                                                       | 233      | 48.9     | 4.8 [4.0,5.6]                 |
| Obstructive chronic bronchitis with (acute) exacerbation                | 403      | 244.4    | 1.6 [1.5,1.8]                 |
| Congestive heart failure, unspecified                                   | 297      | 147.9    | 2.0 [1.8,2.3]                 |
| Epistaxis                                                               | 299      | 164.4    | 1.8 [1.6,2.1]                 |
| Pneumonia, organism unspecified                                         | 302      | 173.1    | 1.7 [1.5,2.0]                 |
| Painful respiration                                                     | 261      | 132.6    | 2.0 [1.7,2.3]                 |
| Other malaise and fatigue                                               | 348      | 222.3    | 1.6 [1.4,1.8]                 |
| Dehydration                                                             | 223      | 108.8    | 2.0 [1.8,2.4]                 |
| Syncope and collapse                                                    | 397      | 291.9    | 1.4 [1.2,1.5]                 |
| Abdominal pain, unspecified site                                        | 389      | 287.0    | 1.4 [1.2,1.5]                 |
| Other and unspecified angina pectoris                                   | 144      | 45.0     | 3.2 [2.6,3.9]                 |
| Other respiratory abnormalities                                         | 228      | 129.1    | 1.8 [1.5,2.0]                 |
| Acute bronchitis                                                        | 301      | 205.6    | 1.5 [1.3,1.7]                 |
| Retention of urine, unspecified                                         | 241      | 147.8    | 1.6 [1.4,1.9]                 |
| Intermediate coronary syndrome                                          | 109      | 23.2     | 4.7 [3.7,6.0]                 |
| Other and unspecified noninfectious gastroenteritis and colitis         | 224      | 137.5    | 1.6 [1.4,1.9]                 |
| Constipation, unspecified                                               | 256      | 169.7    | 1.5 [1.3,1.7]                 |
|                                                                         |          |          |                               |
| <b>Diagnoses with highest incident rate ratios</b> (observed/expected)  |          |          |                               |
| Esophageal reflux                                                       | 233      | 48.9     | 4.8 [4.0,5.6]                 |
| Intermediate coronary syndrome                                          | 109      | 23.2     | 4.7 [3.7,6.0]                 |
| Dyspepsia and other specified disorders of function of stomach          | 36       | 8.0      | 4.5 [2.9,6.9]                 |
| Swelling, mass, or lump in chest                                        | 14       | 2.4      | 5.9 [2.7,12.6]                |
| Chest pain, unspecified                                                 | 1871     | 676.7    | 2.8 [2.6,2.9]                 |
| Other and unspecified angina pectoris                                   | 144      | 45.0     | 3.2 [2.6,3.9]                 |
| Precordial pain                                                         | 110      | 35.3     | 3.1 [2.5,3.9]                 |
| Spondylosis of unspecified site, without mention of myelopathy          | 10       | 1.5      | 6.5 [2.5,16.8]                |
| Unspecified gastritis and gastroduodenitis, w/o mention of hemorrhage   | 100      | 31.8     | 3.1 [2.5,4.0]                 |
| Acute respiratory failure                                               | 11       | 1.8      | 6.0 [2.4,14.6]                |
| Mechanical complication of colostomy and enterostomy                    | 7        | 0.8      | 8.3 [2.4,29.9]                |
| Other chest pain                                                        | 1256     | 512.2    | 2.5 [2.3,2.6]                 |
| Malignant neoplasm of bronchus and lung, unspecified                    | 16       | 3.9      | 4.1 [2.1,7.8]                 |
| Esophagitis, unspecified                                                | 17       | 4.4      | 3.9 [2.0,7.3]                 |
| Pain in thoracic spine                                                  | 51       | 18.0     | 2.8 [2.0,3.9]                 |
| Pressure ulcer, buttock                                                 | 10       | 2.1      | 4.7 [1.9,11.3]                |
| Malignant neoplasm of pancreas, part unspecified                        | 6        | 0.8      | 7.1 [1.9,26.6]                |
| Coronary atherosclerosis of native coronary artery                      | 112      | 47.4     | 2.4 [1.9,2.9]                 |
| Coronary atherosclerosis of unspecified type of vessel, native or graft | 65       | 25.7     | 2.5 [1.9,3.4]                 |
| Congestive heart failure, unspecified                                   | 297      | 147.9    | 2.0 [1.8,2.3]                 |

| <b>Aortic Dissection</b>                                               |          |          |                               |
|------------------------------------------------------------------------|----------|----------|-------------------------------|
| <b>Diagnoses in greatest excess (observed-expected)</b>                | Observed | Expected | Incidence Rate Ratio [95% CI] |
| Chest pain, unspecified                                                | 201      | 51.3     | 3.9 [3.3,4.7]                 |
| Other chest pain                                                       | 155      | 41.5     | 3.7 [3.1,4.6]                 |
| Backache, unspecified                                                  | 60       | 13.9     | 4.3 [3.1,6.0]                 |
| Lumbago                                                                | 59       | 22.6     | 2.6 [1.9,3.5]                 |
| Abdominal pain, unspecified site                                       | 61       | 24.9     | 2.5 [1.8,3.3]                 |
| Painful respiration                                                    | 35       | 12.9     | 2.7 [1.8,4.0]                 |
| Abdominal pain, other specified site                                   | 36       | 13.8     | 2.6 [1.7,3.9]                 |
| Other malaise and fatigue                                              | 44       | 21.9     | 2.0 [1.4,2.8]                 |
| Abdominal pain, epigastric                                             | 30       | 8.9      | 3.4 [2.1,5.3]                 |
| Pneumonia, organism unspecified                                        | 34       | 13.1     | 2.6 [1.7,3.9]                 |
| Unspecified essential hypertension                                     | 59       | 37.8     | 1.6 [1.2,2.1]                 |
| Constipation, unspecified                                              | 31       | 11.4     | 2.7 [1.7,4.2]                 |
| Congestive heart failure, unspecified                                  | 32       | 12.5     | 2.6 [1.7,3.9]                 |
| Obstructive chronic bronchitis with (acute) exacerbation               | 35       | 17.7     | 2.0 [1.3,2.9]                 |
| Other respiratory abnormalities                                        | 27       | 11.3     | 2.4 [1.5,3.8]                 |
| Syncope and collapse                                                   | 37       | 22.4     | 1.7 [1.1,2.4]                 |
| Headache                                                               | 40       | 25.7     | 1.6 [1.1,2.2]                 |
| Pain in thoracic spine                                                 | 14       | 1.8      | 7.7 [3.3,17.7]                |
| Atrial fibrillation                                                    | 25       | 13.1     | 1.9 [1.2,3.0]                 |
| Other acute pain                                                       | 15       | 4.4      | 3.4 [1.7,6.6]                 |
|                                                                        |          |          |                               |
| <b>Diagnoses with highest incident rate ratios (observed/expected)</b> |          |          |                               |
| Pain in thoracic spine                                                 | 14       | 1.8      | 7.7 [3.3,17.7]                |
| Chest pain, unspecified                                                | 201      | 51.3     | 3.9 [3.3,4.7]                 |
| Backache, unspecified                                                  | 60       | 13.9     | 4.3 [3.1,6.0]                 |
| Other chest pain                                                       | 155      | 41.5     | 3.7 [3.1,4.6]                 |
| Unspecified pleural effusion                                           | 9        | 1.1      | 8.0 [2.7,23.8]                |
| Sprain of thoracic                                                     | 10       | 1.7      | 5.9 [2.3,15.0]                |
| Angioneurotic edema, not elsewhere classified                          | 10       | 1.8      | 5.5 [2.1,13.5]                |
| Abdominal pain, epigastric                                             | 30       | 8.9      | 3.4 [2.1,5.3]                 |
| Lumbago                                                                | 59       | 22.6     | 2.6 [1.9,3.5]                 |
| Abdominal pain, unspecified site                                       | 61       | 24.9     | 2.5 [1.8,3.3]                 |
| Painful respiration                                                    | 35       | 12.9     | 2.7 [1.8,4.0]                 |
| Constipation, unspecified                                              | 31       | 11.4     | 2.7 [1.7,4.2]                 |
| Abdominal pain, other specified site                                   | 36       | 13.8     | 2.6 [1.7,3.9]                 |
| Other acute pain                                                       | 15       | 4.4      | 3.4 [1.7,6.6]                 |
| Pneumonia, organism unspecified                                        | 34       | 13.1     | 2.6 [1.7,3.9]                 |
| Tietze's disease                                                       | 6        | 1.0      | 6.1 [1.7,21.2]                |
| Esophageal reflux                                                      | 12       | 3.2      | 3.7 [1.7,7.8]                 |
| Congestive heart failure, unspecified                                  | 32       | 12.5     | 2.6 [1.7,3.9]                 |
| Other respiratory abnormalities                                        | 27       | 11.3     | 2.4 [1.5,3.8]                 |
| Sprain of lumbosacral (joint) (ligament)                               | 5        | 0.8      | 5.9 [1.4,23.3]                |



| <b>Stroke</b>                                                                   |          |          |                                  |
|---------------------------------------------------------------------------------|----------|----------|----------------------------------|
| <b>Diagnoses in greatest excess</b> (observed-expected)                         | Observed | Expected | Incidence Rate Ratio<br>[95% CI] |
| Unspecified transient cerebral ischemia                                         | 5606     | 1074.2   | 5.2 [5.0,5.4]                    |
| Other malaise and fatigue                                                       | 4956     | 1587.0   | 3.1 [3.0,3.2]                    |
| Dizziness and giddiness                                                         | 4464     | 1662.0   | 2.7 [2.6,2.8]                    |
| Urinary tract infection, site not specified                                     | 5046     | 2522.7   | 2.0 [1.9,2.1]                    |
| Unspecified essential hypertension                                              | 3612     | 1710.4   | 2.1 [2.0,2.2]                    |
| Headache                                                                        | 3239     | 1390.8   | 2.3 [2.2,2.4]                    |
| Altered mental status                                                           | 1956     | 611.0    | 3.2 [3.0,3.4]                    |
| Syncope and collapse                                                            | 3029     | 1773.4   | 1.7 [1.6,1.8]                    |
| Disturbance of skin sensation                                                   | 1422     | 348.5    | 4.1 [3.8,4.4]                    |
| Dehydration                                                                     | 1662     | 684.4    | 2.4 [2.3,2.6]                    |
| Chest pain, unspecified                                                         | 3277     | 2419.7   | 1.4 [1.3,1.4]                    |
| Atrial fibrillation                                                             | 1541     | 738.0    | 2.1 [2.0,2.2]                    |
| Congestive heart failure, unspecified                                           | 1804     | 1009.4   | 1.8 [1.7,1.9]                    |
| Head injury, unspecified                                                        | 1736     | 1017.3   | 1.7 [1.6,1.8]                    |
| Abdominal pain, unspecified site                                                | 1963     | 1262.8   | 1.6 [1.5,1.6]                    |
| Contusion of face, scalp, and neck except eye(s)                                | 1798     | 1103.8   | 1.6 [1.5,1.7]                    |
| Epistaxis                                                                       | 1622     | 1014.3   | 1.6 [1.5,1.7]                    |
| Nausea with vomiting                                                            | 1190     | 589.1    | 2.0 [1.9,2.2]                    |
| Other musculoskeletal symptoms referable to limbs                               | 680      | 106.0    | 6.4 [5.8,7.1]                    |
| Pain in limb                                                                    | 1613     | 1060.3   | 1.5 [1.4,1.6]                    |
|                                                                                 |          |          |                                  |
| <b>Diagnoses with highest incident rate ratios</b> (observed/expected)          |          |          |                                  |
| Homonymous bilateral field defects                                              | 27       | 1.7      | 16.0 [7.8,34.7]                  |
| Other musculoskeletal symptoms referable to limbs                               | 680      | 106.0    | 6.4 [5.8,7.1]                    |
| Other speech disturbance                                                        | 249      | 36.1     | 6.9 [5.8,8.2]                    |
| Unspecified transient cerebral ischemia                                         | 5606     | 1074.2   | 5.2 [5.0,5.4]                    |
| Facial weakness                                                                 | 138      | 23.2     | 5.9 [4.7,7.5]                    |
| Dysarthria                                                                      | 54       | 9.0      | 6.0 [4.1,8.8]                    |
| Hemiplegia, unspecified, affecting unspecified side                             | 34       | 5.1      | 6.7 [4.1,11.0]                   |
| Wrist drop (acquired)                                                           | 13       | 1.3      | 10.3 [4.1,27.2]                  |
| Reactive confusion                                                              | 28       | 4.1      | 6.9 [3.9,12.0]                   |
| Other localized visual field defect                                             | 9        | 0.7      | 12.8 [3.9,48.6]                  |
| Disturbance of skin sensation                                                   | 1422     | 348.5    | 4.1 [3.8,4.4]                    |
| Central retinal artery occlusion                                                | 23       | 3.2      | 7.1 [3.8,13.3]                   |
| Aphasia                                                                         | 124      | 26.0     | 4.8 [3.8,6.0]                    |
| Muscle weakness (generalized)                                                   | 268      | 62.3     | 4.3 [3.7,5.0]                    |
| Occlusion and stenosis of carotid artery without mention of cerebral infarction | 90       | 18.6     | 4.8 [3.7,6.4]                    |
| Unspecified visual disturbance                                                  | 134      | 29.7     | 4.5 [3.6,5.6]                    |
| Other specified visual disturbances                                             | 233      | 55.1     | 4.2 [3.6,5.0]                    |
| Malignant neoplasm of ovary                                                     | 14       | 1.7      | 8.3 [3.6,19.6]                   |
| Other symptoms involving nervous and musculoskeletal systems                    | 60       | 12.2     | 4.9 [3.5,6.9]                    |
| Mononeuritis of upper limb, unspecified                                         | 85       | 18.6     | 4.6 [3.4,6.1]                    |

| <b>Subarachnoid Hemorrhage</b>                                                                       |          |          |                               |
|------------------------------------------------------------------------------------------------------|----------|----------|-------------------------------|
| <b>Diagnoses in greatest excess</b> (observed-expected)                                              | Observed | Expected | Incidence Rate Ratio [95% CI] |
| Headache                                                                                             | 351      | 61.5     | 5.7 [4.9,6.6]                 |
| Unspecified transient cerebral ischemia                                                              | 85       | 24.6     | 3.5 [2.6,4.5]                 |
| Unspecified essential hypertension                                                                   | 90       | 43.5     | 2.1 [1.6,2.6]                 |
| Other malaise and fatigue                                                                            | 78       | 35.6     | 2.2 [1.7,2.8]                 |
| Cervicalgia                                                                                          | 50       | 12.2     | 4.1 [2.8,5.9]                 |
| Dizziness and giddiness                                                                              | 85       | 51.0     | 1.7 [1.3,2.1]                 |
| Vomiting alone                                                                                       | 44       | 13.1     | 3.4 [2.3,4.9]                 |
| Other and unspecified noninfectious gastroenteritis and colitis                                      | 49       | 18.6     | 2.6 [1.9,3.7]                 |
| Urinary tract infection, site not specified                                                          | 97       | 67.9     | 1.4 [1.1,1.8]                 |
| Sprain of neck                                                                                       | 40       | 13.4     | 3.0 [2.0,4.4]                 |
| Altered mental status                                                                                | 42       | 15.0     | 2.8 [1.9,4.0]                 |
| Nausea with vomiting                                                                                 | 45       | 18.3     | 2.5 [1.7,3.5]                 |
| Head injury, unspecified                                                                             | 56       | 29.0     | 1.9 [1.4,2.6]                 |
| Lumbago                                                                                              | 60       | 34.0     | 1.8 [1.3,2.3]                 |
| Syncope and collapse                                                                                 | 75       | 49.4     | 1.5 [1.2,2.0]                 |
| Abdominal pain, unspecified site                                                                     | 64       | 38.8     | 1.6 [1.2,2.2]                 |
| Migraine, unspecified, without mention of intractable migraine without mention of status migrainosus | 48       | 23.6     | 2.0 [1.4,2.8]                 |
| Backache, unspecified                                                                                | 43       | 21.7     | 2.0 [1.4,2.8]                 |
| Disturbance of skin sensation                                                                        | 28       | 9.4      | 3.0 [1.8,4.7]                 |
| Unspecified viral infection                                                                          | 22       | 4.5      | 4.9 [2.7,8.7]                 |
|                                                                                                      |          |          |                               |
| <b>Diagnoses with highest incident rate ratios</b> (observed/expected)                               |          |          |                               |
| Headache                                                                                             | 351      | 61.5     | 5.7 [4.9,6.6]                 |
| Tension headache                                                                                     | 14       | 1.3      | 11.1 [4.5,29.0]               |
| Cerebral aneurysm, nonruptured                                                                       | 14       | 2.1      | 6.6 [3.0,14.7]                |
| Cervicalgia                                                                                          | 50       | 12.2     | 4.1 [2.8,5.9]                 |
| Unspecified viral infection                                                                          | 22       | 4.5      | 4.9 [2.7,8.7]                 |
| Unspecified transient cerebral ischemia                                                              | 85       | 24.6     | 3.5 [2.6,4.5]                 |
| Vomiting alone                                                                                       | 44       | 13.1     | 3.4 [2.3,4.9]                 |
| Sprain of neck                                                                                       | 40       | 13.4     | 3.0 [2.0,4.4]                 |
| Bell's palsy                                                                                         | 7        | 1.1      | 6.2 [1.9,19.6]                |
| Altered mental status                                                                                | 42       | 15.0     | 2.8 [1.9,4.0]                 |
| Other and unspecified noninfectious gastroenteritis and colitis                                      | 49       | 18.6     | 2.6 [1.9,3.7]                 |
| Disturbance of skin sensation                                                                        | 28       | 9.4      | 3.0 [1.8,4.7]                 |
| Nausea with vomiting                                                                                 | 45       | 18.3     | 2.5 [1.7,3.5]                 |
| Other malaise and fatigue                                                                            | 78       | 35.6     | 2.2 [1.7,2.8]                 |
| Unspecified essential hypertension                                                                   | 90       | 43.5     | 2.1 [1.6,2.6]                 |
| Angioneurotic edema, not elsewhere classified                                                        | 13       | 4.1      | 3.2 [1.5,6.3]                 |
| Other musculoskeletal symptoms referable to limbs                                                    | 7        | 1.5      | 4.5 [1.5,12.8]                |
| Dementia, unspecified, without behavioral disturbance                                                | 7        | 1.5      | 4.5 [1.5,12.8]                |
| Contusion of hip                                                                                     | 32       | 14.1     | 2.3 [1.5,3.4]                 |
| Spasm of muscle                                                                                      | 8        | 2.0      | 4.1 [1.5,10.4]                |

eTable 5 compares the relative incidence of principal discharge diagnoses in the 45 days preceding the index hospital admission to the incidence in the preceding 320 days. For each diagnosis, the number of ED discharges observed within 45 days of the index admission is shown, together with the number expected, using the average incidence in the preceding 320 days (i.e.  $N_{\text{expected}} = (N_{\text{observed, days 46 to 365}}) * 45 / 320$ ). For each of the five types of cardiovascular emergencies, the 20 discharge diagnoses associated with the greatest number of excess visits (i.e. the greatest difference between observed and expected), representing the most common discharge diagnoses given to patients with an unrecognized diagnosis, along with the 20 diagnoses associated with the highest incident rate ratios (i.e. the greatest ratio of observed to expected, determined by the lower bound of the 95% confidence interval), representing the discharge diagnoses with the highest positive predictive value.

**eFigure.** Distribution of ED discharges in the year preceding index hospital admission

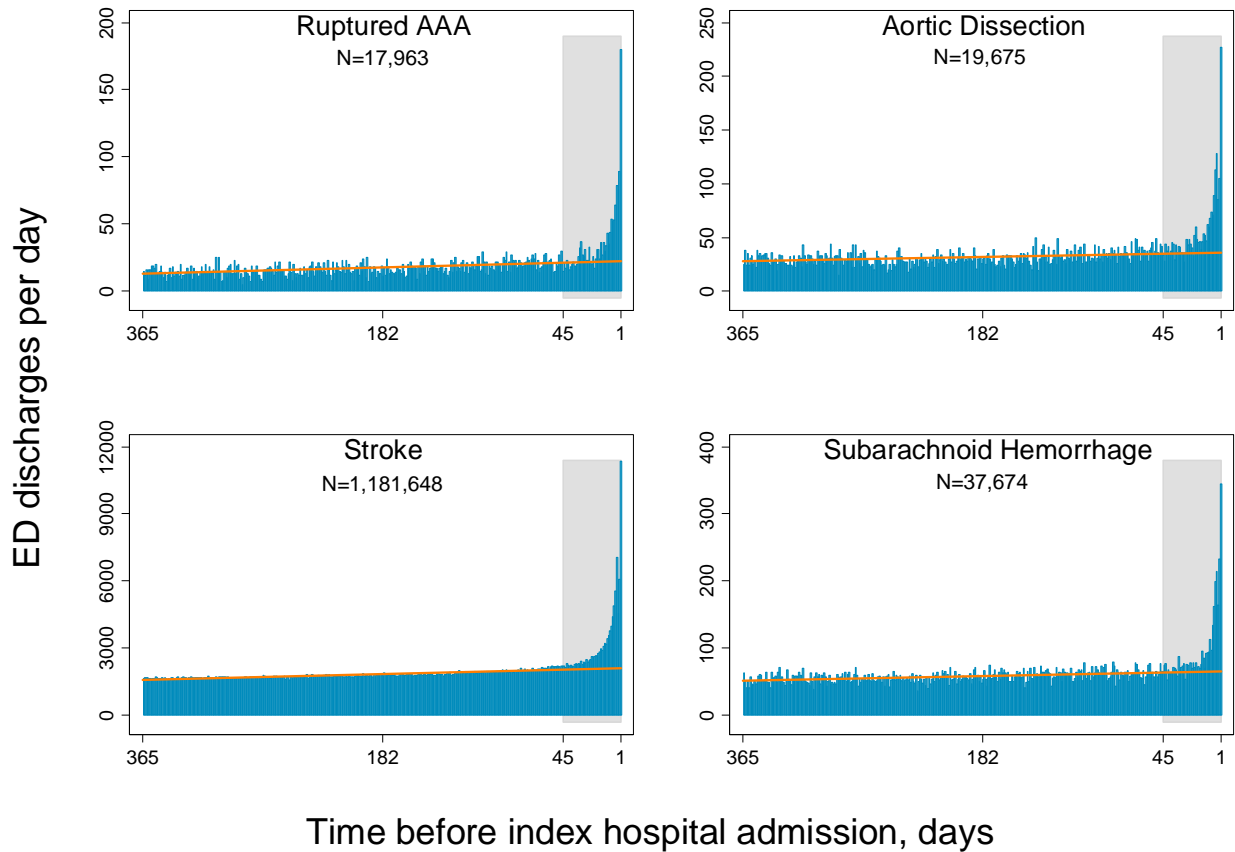

**eFigure.** This graph shows the timing of ED discharges among patients ultimately diagnosed with ruptured AAA, aortic dissection, stroke, and subarachnoid hemorrhage, over the 365 days preceding their index hospital admission. The height of each vertical bar represents the observed number of daily ED discharges, and the regression line represents the number expected. The logistic regression was fitted using the unshaded portion of the graph (i.e. days 365-46). The number of unrecognized diagnostic opportunities is represented as the net difference between the number of ED discharges observed (vertical bars) and the number expected (regression line) during the 45 days preceding the index hospital admission (shaded area). eFigure 1 (online supplement) provides a similar illustration of the other four conditions. Figure 1 in the main text provides a similar illustration for acute myocardial infarction.
